# Supplementary material for: Star polypeptides by NCA polymerisation from dendritic initiators: synthesis and enzyme controlled payload release
Source: Royal Society of Chemistry journal article supplement (doi:10.1039/c2py20327h), 2012-01-01
Supplement: c2py20327h.pdf [file c2py20327h.pdf]

## Supporting Information

### Star polypeptides by NCA polymerisation from dendritic initiators: Synthesis and enzyme controlled payload release

Mark Byrne,<sup>a</sup> Paul D. Thornton<sup>a</sup>, Sally-Ann Cryan<sup>b</sup> and Andreas Heise<sup>\*a,b</sup>

(a) School of Chemical Sciences, Dublin City University, Glasnevin, Dublin 9, Ireland.

(b) School of Pharmacy, Royal College of Surgeons in Ireland, Dublin 2, Ireland.

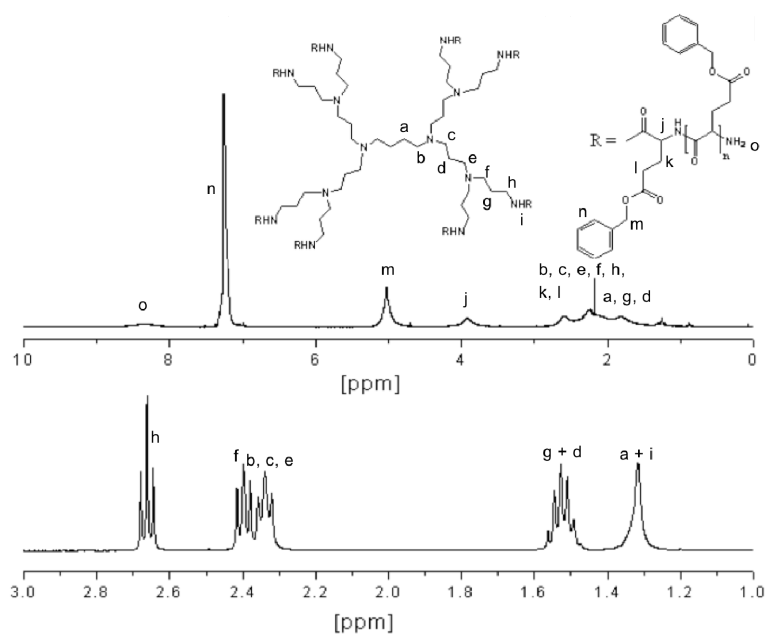

Figure S-1: <sup>1</sup>H NMR spectra of G2 PPI dendrimer (bottom, R=H) and 8-armed star shaped PBLG (CHCl<sub>3</sub>) (top, dendrimer peaks a-i not visible).

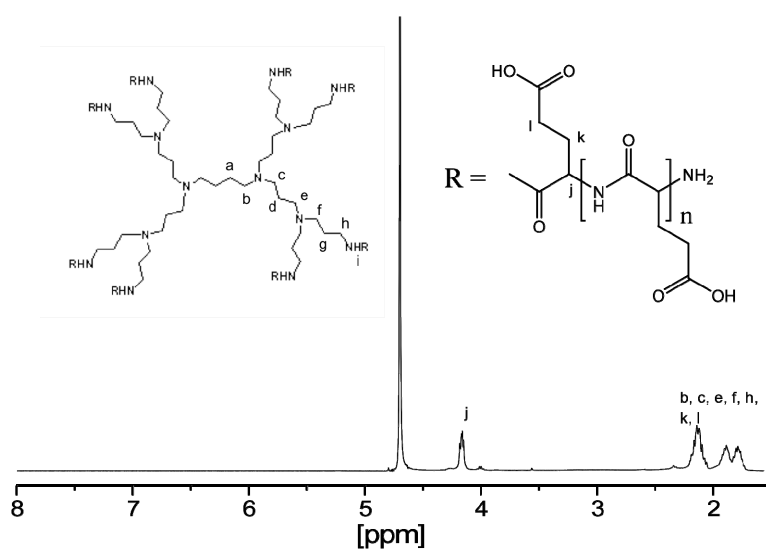

Figure S-2: <sup>1</sup>H NMR spectrum of deprotected 8-armed star shaped PGA in D<sub>2</sub>O (solvent peak at 4.7 ppm). Peaks a-i are of the dendrimer core are not visible in the spectrum.

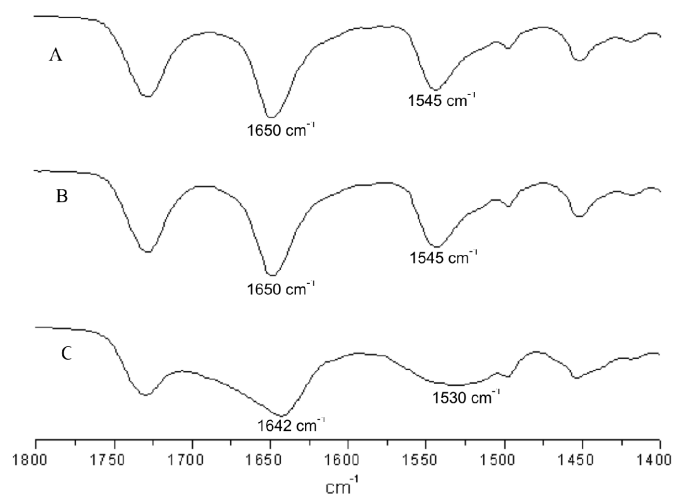

Figure S-3: Section of FT-IR spectra of linear PBLG (A), G5-PPI-PBLG with 40 units per arm (B) and 2 units per arm (C).
